# Supplementary material for: Domperidone, a Dopamine Receptor D2 Antagonist, Induces Apoptosis by Inhibiting the ERK/STAT3-Mediated Pathway in Human Colon Cancer HCT116 Cells
Source: PubMed Central journal article supplement — Biomol Ther (Seoul). 2024 Jun 25;32(5):568–76. doi: 10.4062/biomolther.2024.048 (PMC11392662; doi:10.4062/biomolther.2024.048), 2024-06-25
Supplement: bt-32-5-568-supple.pdf [file bt-32-5-568-supple.pdf]

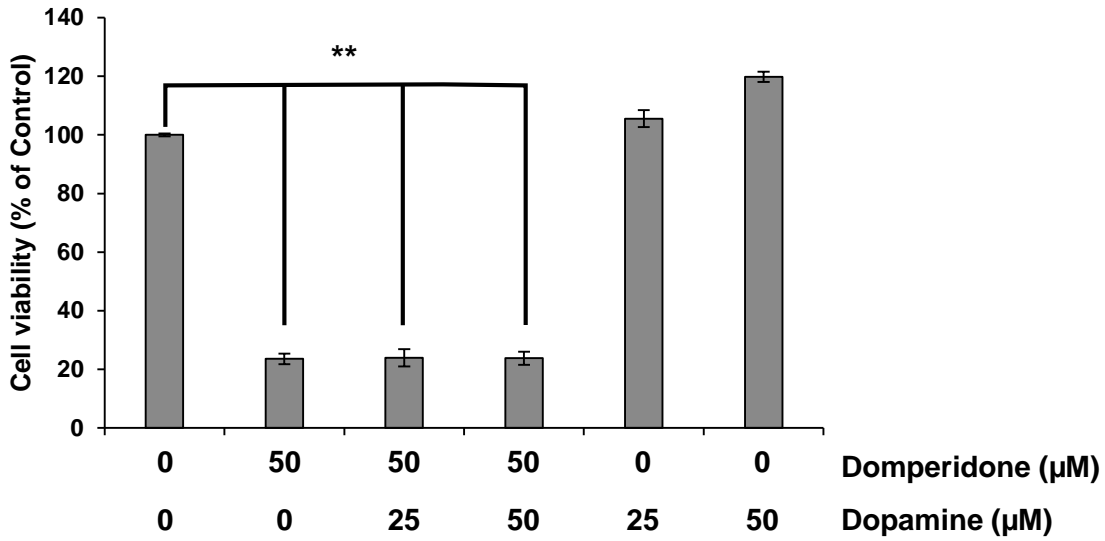

Supplementary Fig. 1. Effects of dopamine on domperidone treated HCT116 cells. HCT116 cells were treated with 50 μM of domperidone for 48 h, and then dopamine was treated to HCT116 cells. Cell viability was determined using MTS cell viability assay. Data are shown as the mean±SD. \*\*, P < 0.01.
